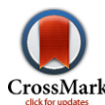

## Correction

# Correction: Towards User-Friendly Spelling with an Auditory Brain-Computer Interface: The CharStreamer Paradigm

The *PLOS ONE* Staff

## Notice of Republication

This article was republished on June 19, 2014, due to multiple typesetting errors. The publisher apologizes for these errors. Please download the PDF again to view the corrected article. The originally published, uncorrected article and the republished, corrected article are provided here for reference.

## Supporting Information

**File S1.** Originally published, uncorrected article (PDF)

**File S2.** Republished, corrected article (PDF)

## Reference

1. Hühne J, Tangermann M (2014) Towards User-Friendly Spelling with an Auditory Brain-Computer Interface: The CharStreamer Paradigm. *PLoS ONE* 9(6): e98322. doi:10.1371/journal.pone.0098322

---

**Citation:** The *PLOS ONE* Staff (2014) Correction: Towards User-Friendly Spelling with an Auditory Brain-Computer Interface: The CharStreamer Paradigm. *PLoS ONE* 9(7): e102630. doi:10.1371/journal.pone.0102630

**Published:** July 7, 2014

**Copyright:** © 2014 The *PLOS ONE* Staff. This is an open-access article distributed under the terms of the Creative Commons Attribution License, which permits unrestricted use, distribution, and reproduction in any medium, provided the original author and source are credited.
